# Supplementary material for: Lipid droplets are a metabolic vulnerability in melanoma
Source: PubMed Central journal article supplement (PMC10238408; doi:10.1038/s41467-023-38831-9), 2023-06-02
Supplement: 41467_2023_38831_MOESM1_ESM.pdf [file 41467_2023_38831_MOESM1_ESM.pdf]

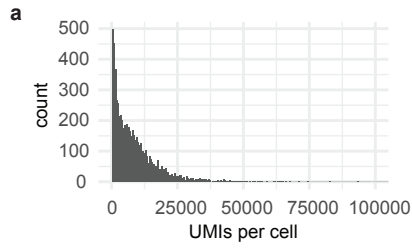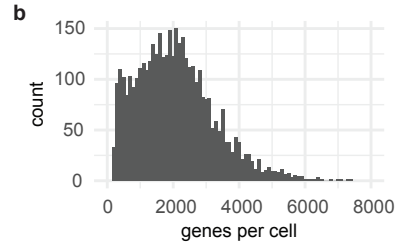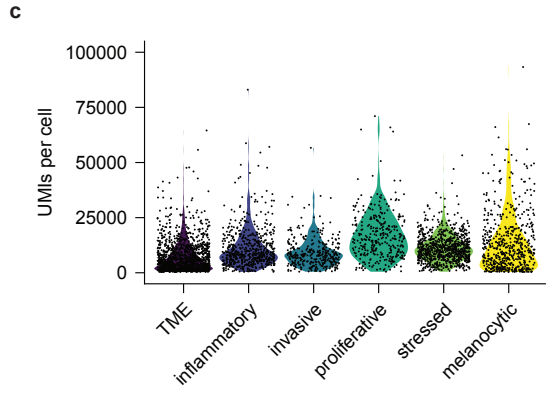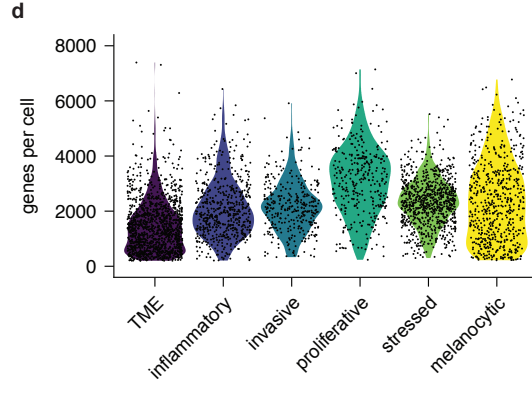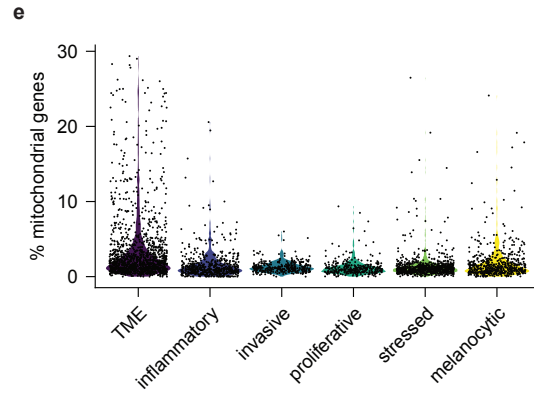

Supplementary Fig. 1: scRNA-seq data statistics.

a-b, Histograms of unique molecular identifiers (UMIs): a, and number of unique genes per cell: b, in the total data set of 3968 zebrafish melanoma and TME cells. c-d, Violin plot of UMIs per cell: c, unique genes per cell: d, and percent mitochondrial genes per cell: e, in each cluster assignment.



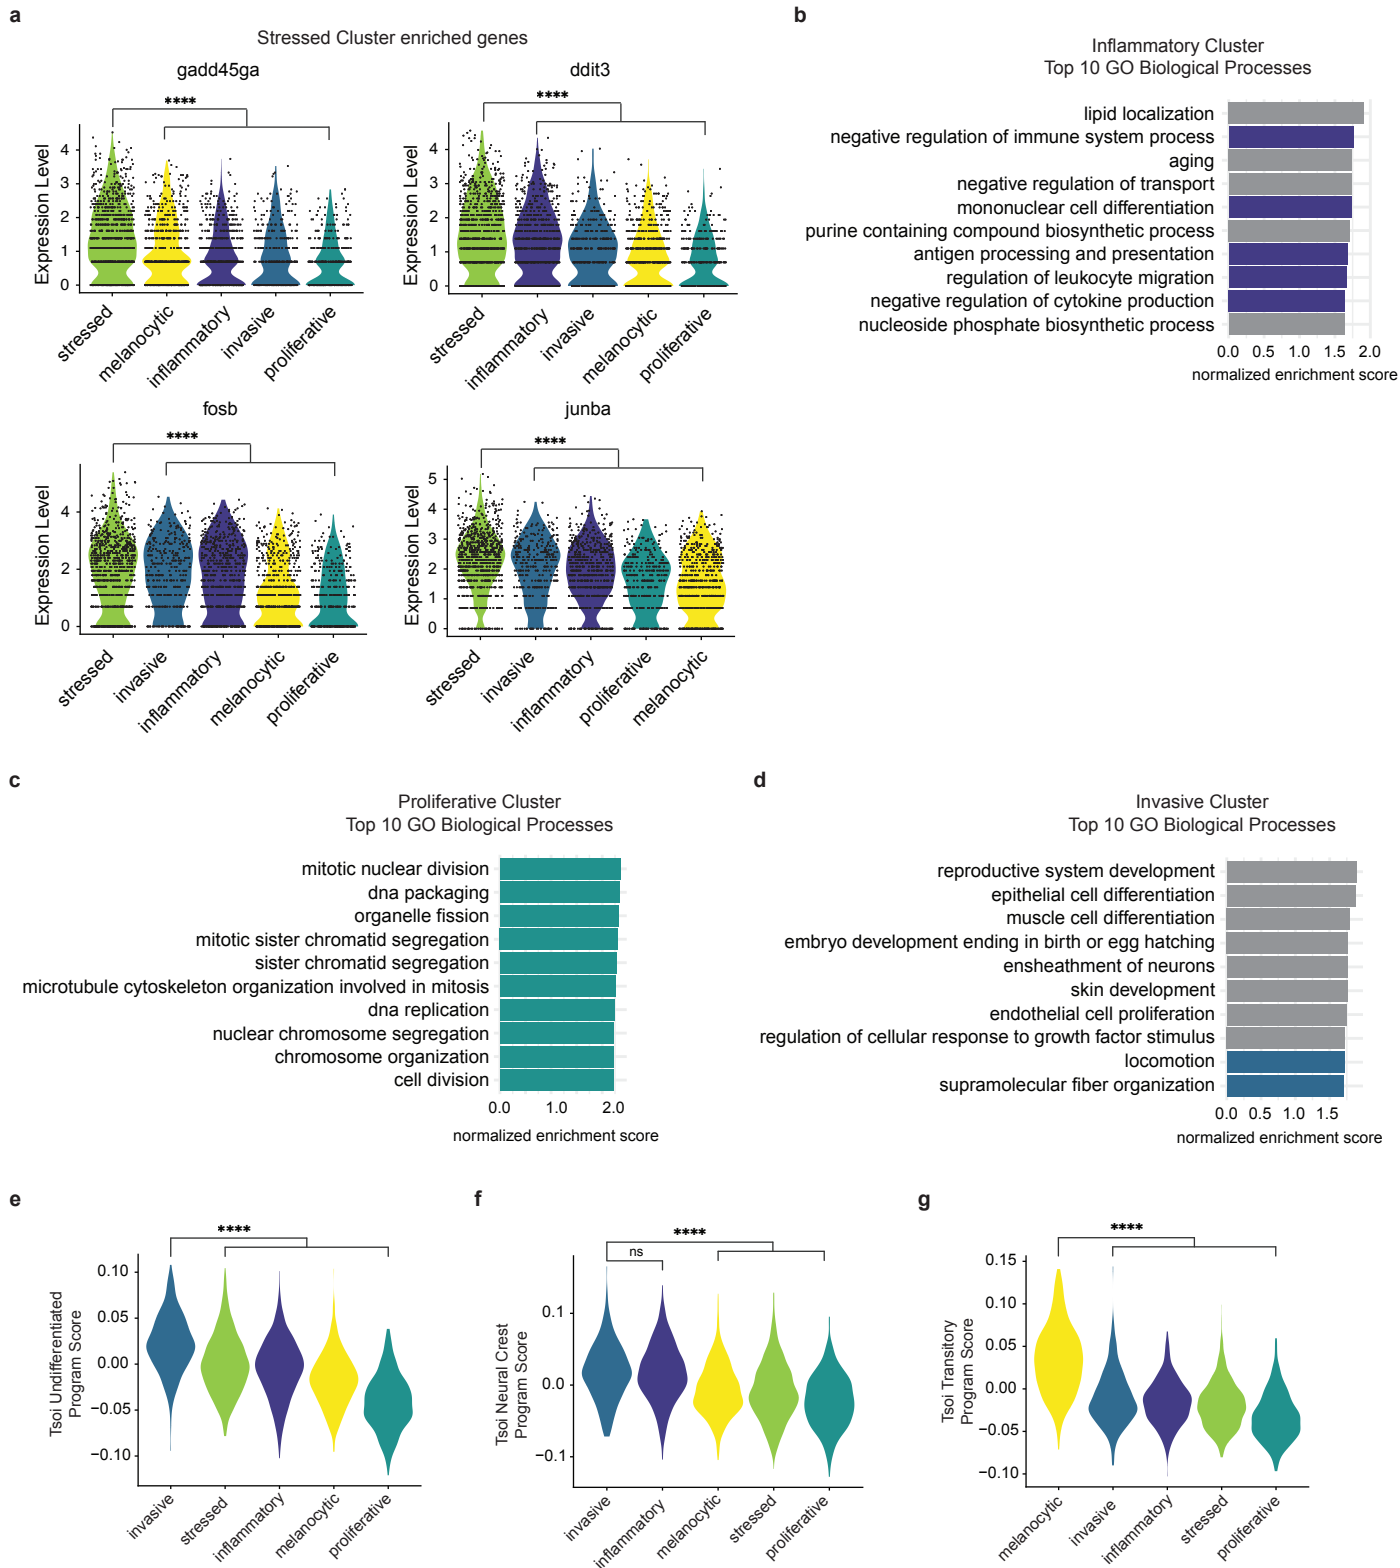

Supplementary Fig. 2: Expression of differentially expressed genes and pathways in stressed, inflammatory, proliferative, and invasive melanoma clusters.

a, Violin plot of genes associated with cell stress that are differentially upregulated in the stressed cluster. Statistics via two-sided Wilcoxon rank-sum test<sup>22</sup>. \*\*\*\*  $p < 0.0001$ . b-d, Top 10 enriched GO Biological Processes in inflammatory: b, proliferative: c, and invasive: d, clusters. Pathways are color coded based on relevance to cluster annotation in Fig. 1b. e-g, Tsoi Undifferentiated, Neural Crest Program, and Transitory4 module scores for cells in each melanoma cell state. Adjusted p-values calculated using two-sided Wilcoxon rank-sum test with Holm correction. \*\*\*\*  $p < 0.0001$ .

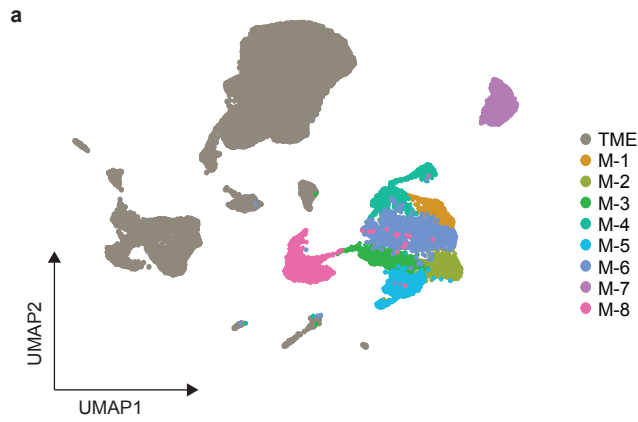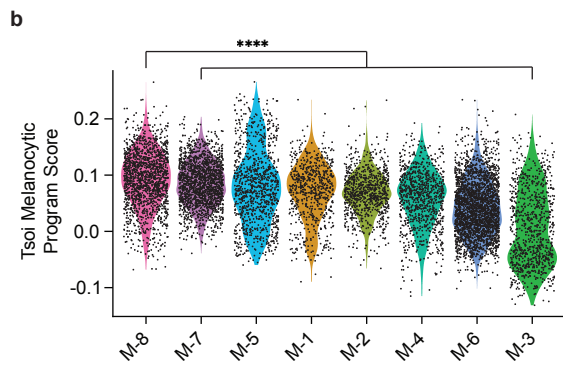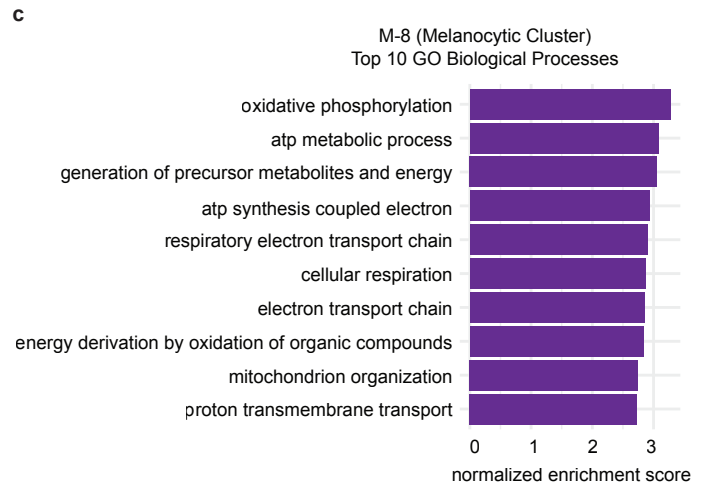

Supplementary Fig. 3: Melanocytic cell state enriches for oxidative metabolic pathways in human melanoma brain and leptomeningeal metastases.

a, UMAP projection of human melanoma brain and leptomeningeal metastases from Smalley et al.<sup>24</sup>. Unsupervised clustering<sup>22</sup> identified eight different melanoma clusters and TME cells as indicated. b, Melanoma cluster 8 (M-8) most enriches for Tsoi Melanocytic Program<sup>4</sup> module score. Adjusted p-values calculated using two-sided Wilcoxon rank-sum test with Holm correction. \*\*\*\*  $p < 0.0001$ . c, Top 10 enriched GO Biological Processes by multi-level Monte Carlo with Benjamini-Hochberg adjusted p-values  $< 0.01$  in M-8 (Melanocytic Cluster) showing oxidative metabolic pathways.

a

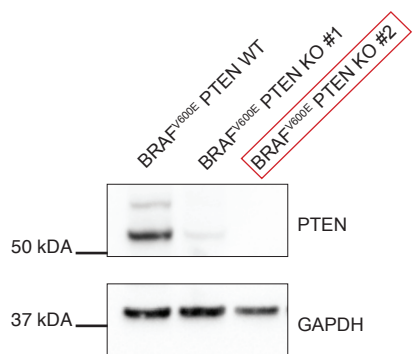

b

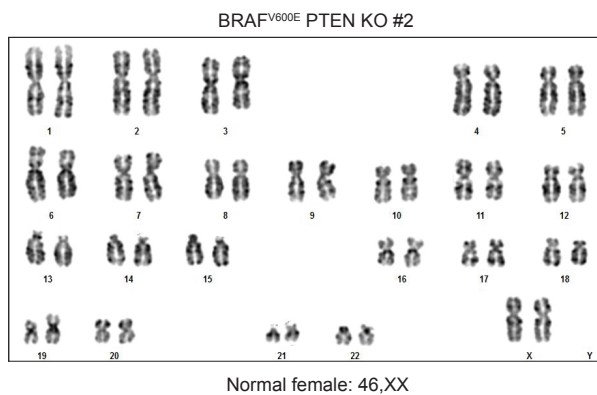

Supplementary Fig. 4: Human pluripotent stem cells (hPSC) PTEN knockout line.

a, The doxycycline (dox)-inducible BRAF<sup>V600E</sup> hPSC line<sup>13</sup> was genetically engineered to be knockout (KO) for PTEN. Western blotting validates the full loss of PTEN in the KO line #2. b, Karyotypic analysis of the dox-inducible BRAF<sup>V600E</sup> PTEN KO hPSC line used in this study shows no major chromosomal abnormalities.

**a**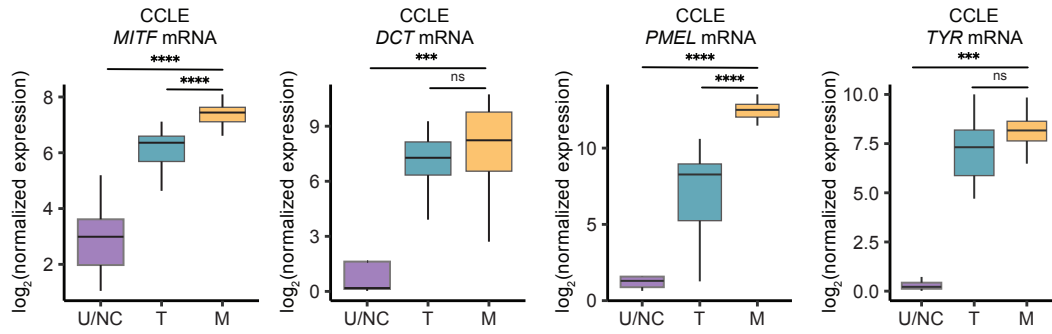**b**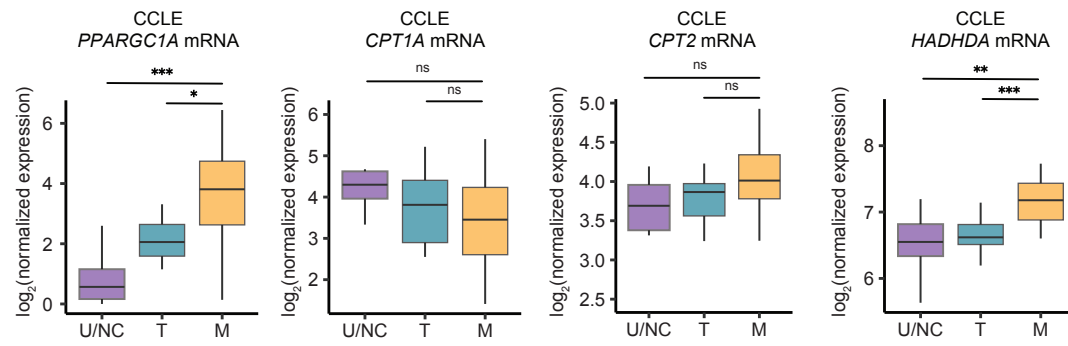**c**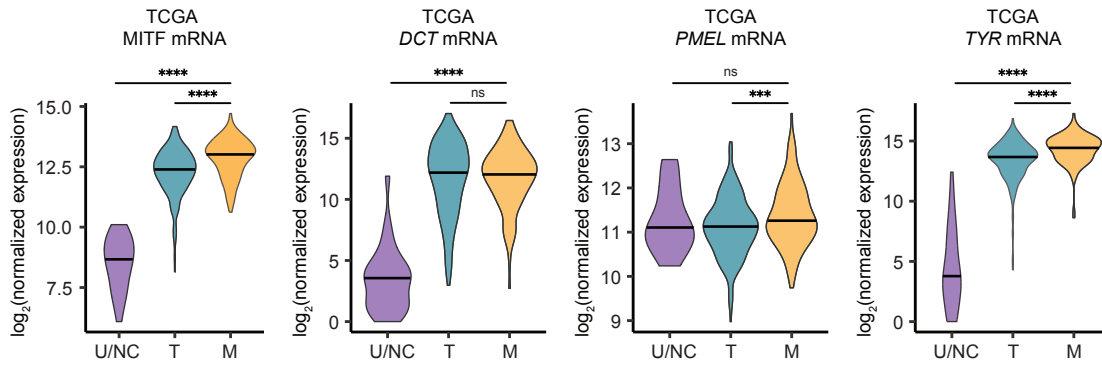**d**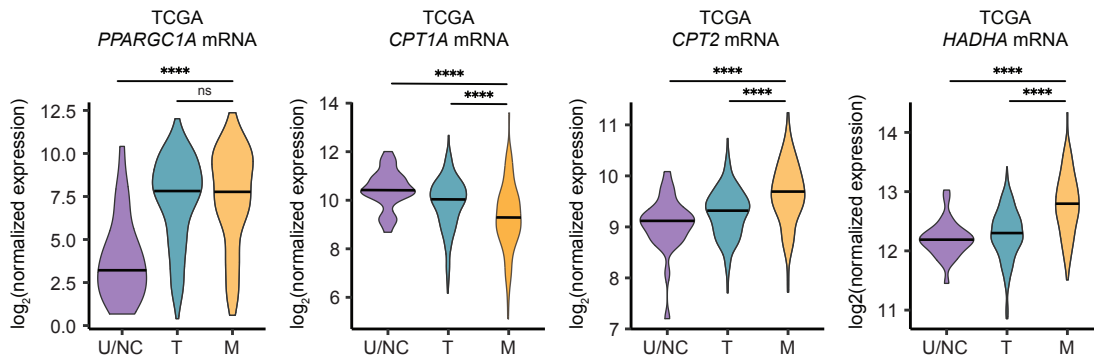

Supplementary Fig. 5: Melanocytic and fatty acid oxidation gene expression.  
a-b, CCLE log<sub>2</sub> normalized mRNA expression for select: a, melanocytic and b, fatty acid oxidation genes. Data represented as Tukey's boxplot center = median, box bounds = 25th and 75th percentile, whiskers = min and max for undifferentiated/neural crest (U/N) n = 8, transitory (T) n = 12, melanocytic (M) n = 18. \*  $p < 0.05$ , \*\*  $p < 0.01$ , \*\*\*  $p < 0.001$ , \*\*\*\*  $p < 0.0001$ . c-d, TCGA log<sub>2</sub> normalized mRNA expression for select: c, melanocytic and d, fatty acid oxidation genes. Data represented as violin plot with mean for (U/N) n = 29, (T) n = 291, and (M) n = 123. Statistics via two-sided Wilcoxon rank sum test with Holm correction. \*\*\*  $p < 0.001$ , \*\*\*\*  $p < 0.0001$ .



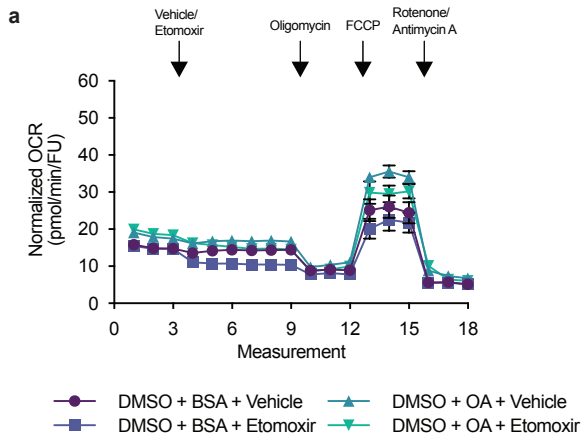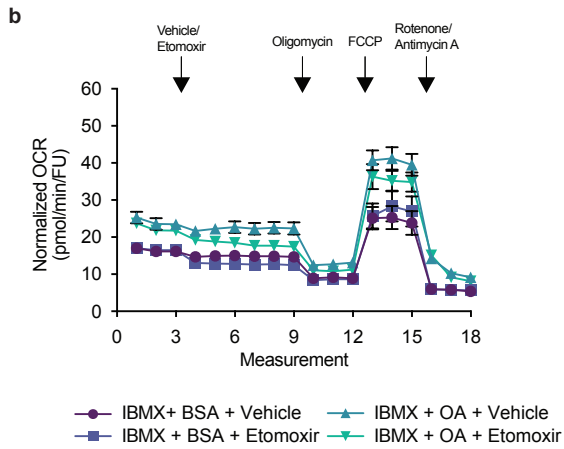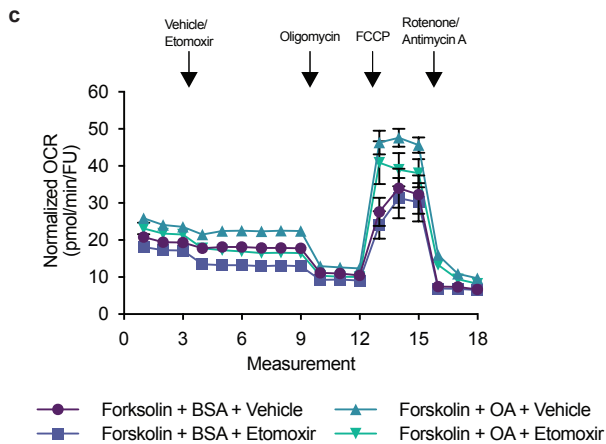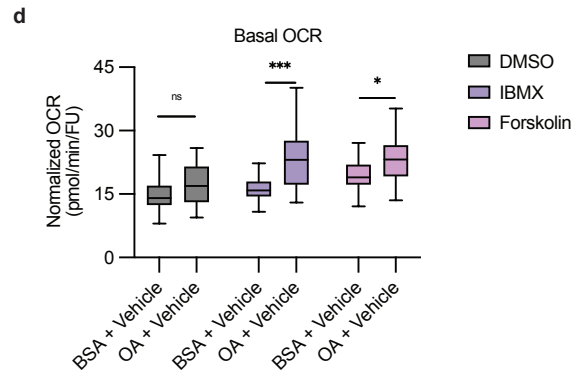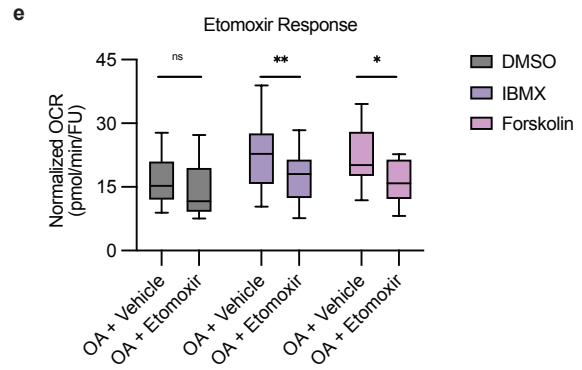

Supplementary Fig. 6: Melanocytic cells utilize fatty acids for beta-oxidation. a-c, Representative normalized OCR measurements for FAO stress test in DMSO (a), IBMX (b) or Forskolin (c) treated human A375 cells (mean  $\pm$  SEM, n = 3 biologically independent experiments). Measurements are plotted separately for ease of visualization. d, Basal OCR from measurement 3 reported in normalized OCR values (Tukey's boxplot center = median, box bounds = 25th and 75th percentile, whiskers = min and max, n = 3 biologically independent experiments). \*  $p=0.01$ , \*\*\*  $p<0.001$ . e, Etomoxir response from measurement 9 reported in normalized OCR values (Tukey's boxplot center = median, box bounds = 25th and 75th percentile, whiskers = min and max, n = 3 biologically independent experiments). Statistics via two-tailed t-test with Holm-Sidak correction. \*  $p=0.04$ , \*\*  $p=0.004$ .

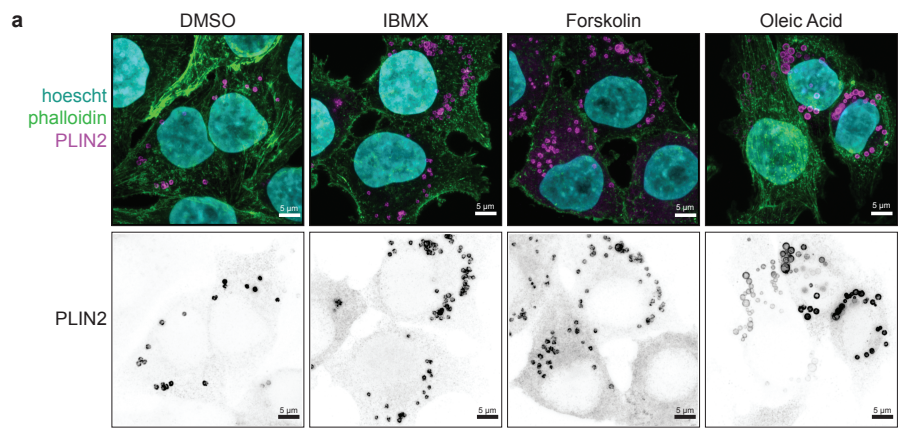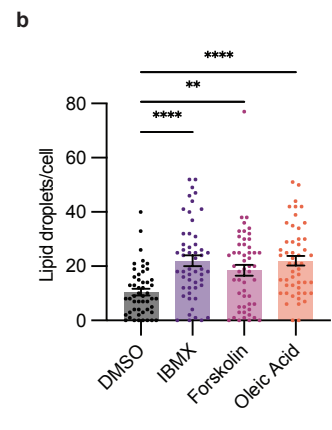

Supplementary Fig. 7: A375 cells increase lipid droplet production upon acquisition of melanocytic cell state.

a-b, (a) Representative fluorescent images of PLIN2+ lipid droplets in drug treated human A375 cells and (b) corresponding quantification of PLIN2+ lipid droplets per cell (mean  $\pm$  SEM, DMSO n = 50 biologically independent replicates, IBMX n = 52 biologically independent replicates, Forskolin n = 52 biologically independent replicates, OA n = 51 biologically independent replicates over n = 3 biologically independent experiments). Statistics via Kruskal Wallis with Dunn's multiple comparisons test. \*\*  $p=0.004$ , \*\*\*\*  $p<0.0001$ .

**a**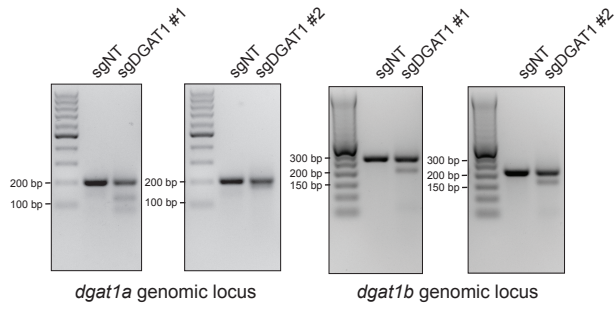**b**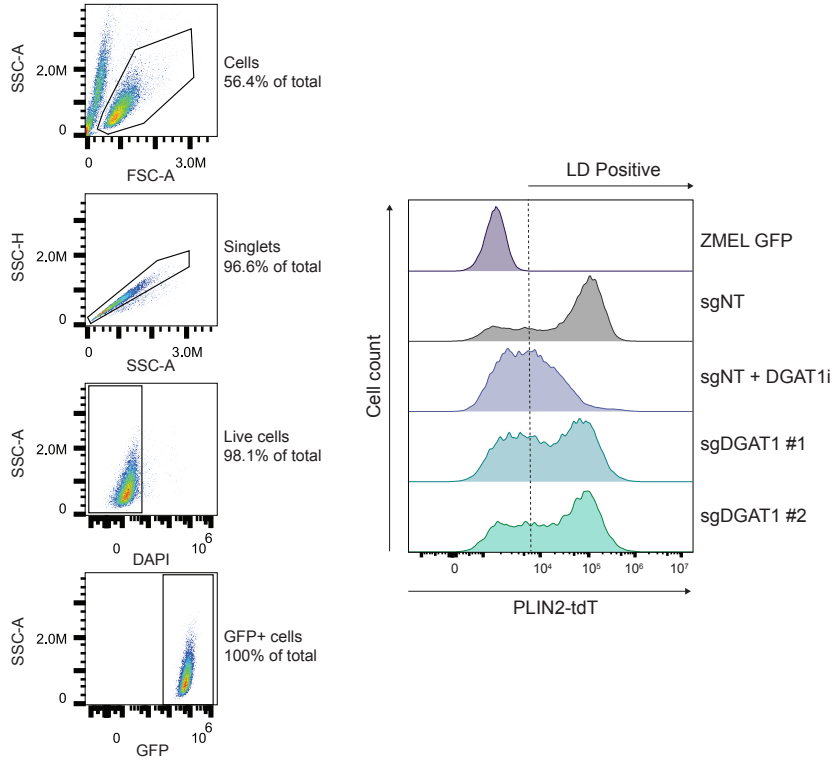**c**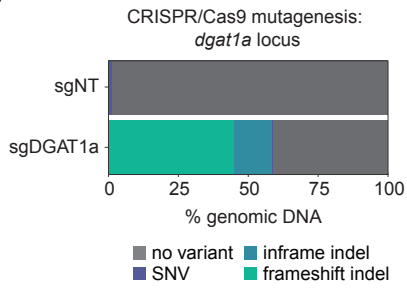**d**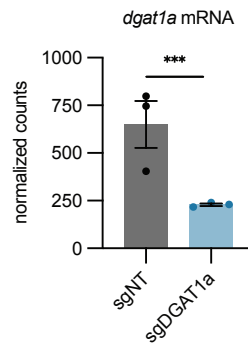

Supplementary Fig. 8: Validation of *dgat1a* and DGAT1 perturbation in zebrafish and human melanoma cells.

a, Surveyor nuclease assay for sgDGAT1 guide sets demonstrating indels introduced at the *dgat1a* and *dgat1b* genomic loci. Blots run for n = 3 biologically independent experiments. b, Gating strategy and histogram of PLIN2-tdTomato expression in ZMEL-LD cells with DGAT1 perturbation. ZMEL GFP cells devoid of tdTomato expression are negative control for PLIN2-tdTomato. c, Bar plot of CRISPR/Cas9 mutagenesis in *dgat1a* locus of sorted zebrafish melanomas as indicated from Fig. 6a. d, Normalized counts for *dgat1a* mRNA in sorted zebrafish melanomas as indicated from Fig. 6a (mean  $\pm$  SEM, n = 3 zebrafish per genotype). Statistics via Wald test. \*\*\*  $p < 0.001$ .

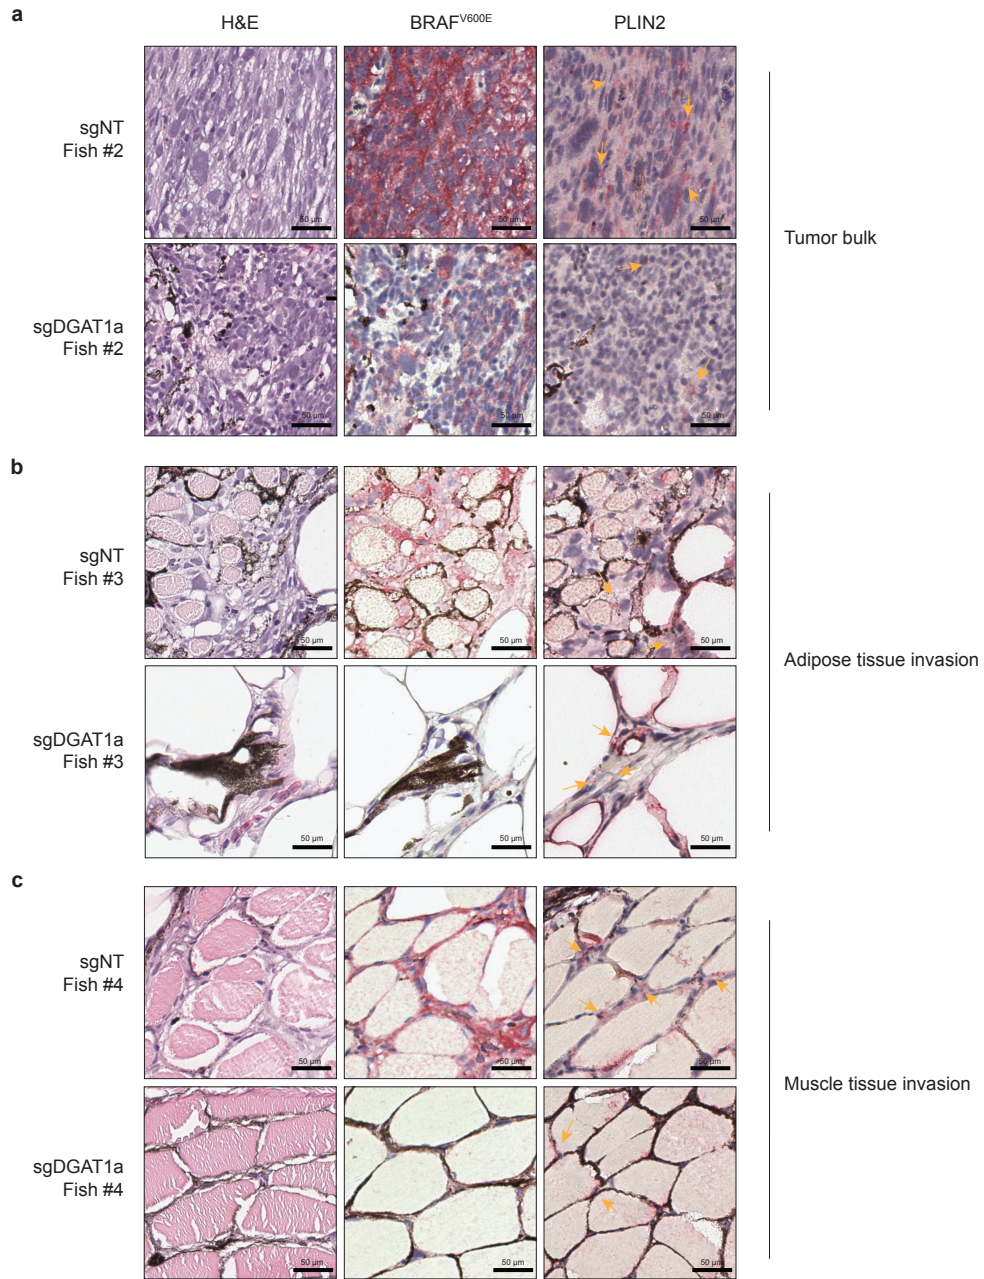

Supplementary Fig. 9: Decreased PLIN2 staining in *dgat1a* knockout tumors.

a-c, Representative histological images from individual TEAZ generated tumors (n = 4 fish per genotype) in matched areas stained with H&E, BRAF<sup>V600E</sup>, and PLIN2. Yellow arrows indicate punctate PLIN2 staining in the: (a) tumor bulk, (b) adipose tissue invasion, and (c) muscle tissue invasion.



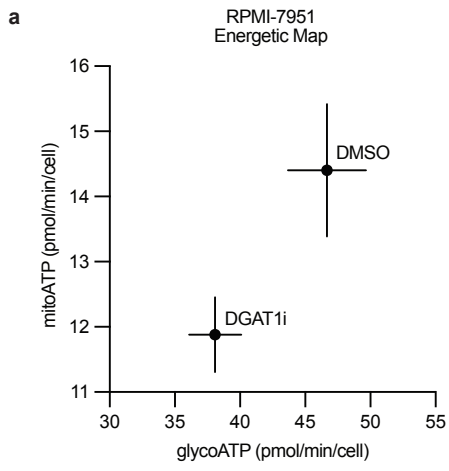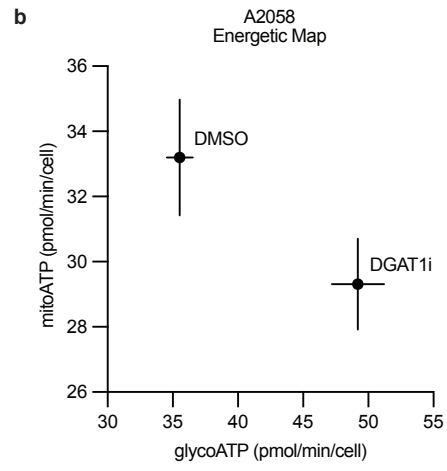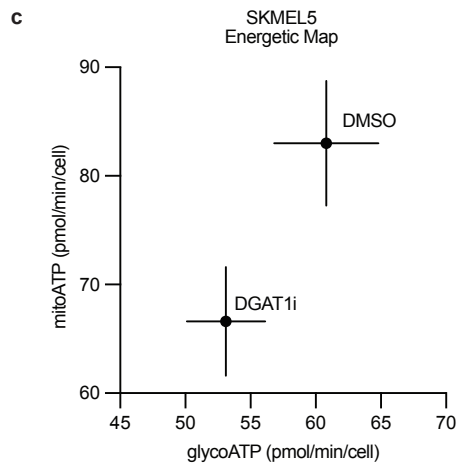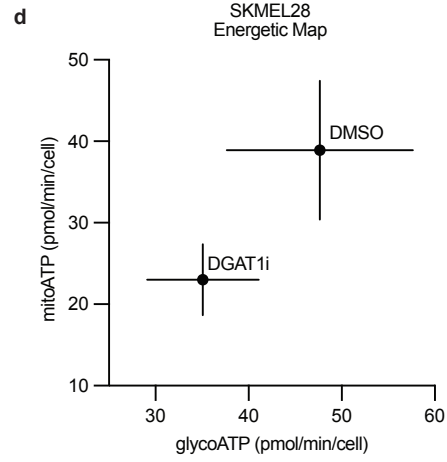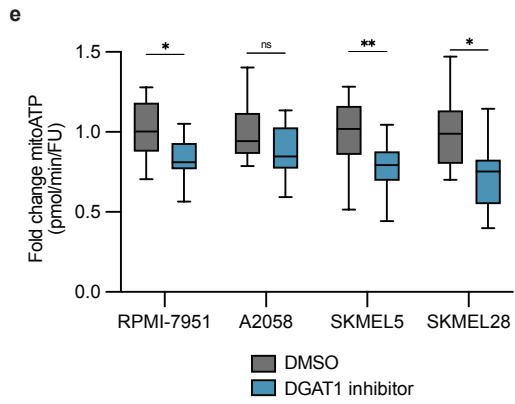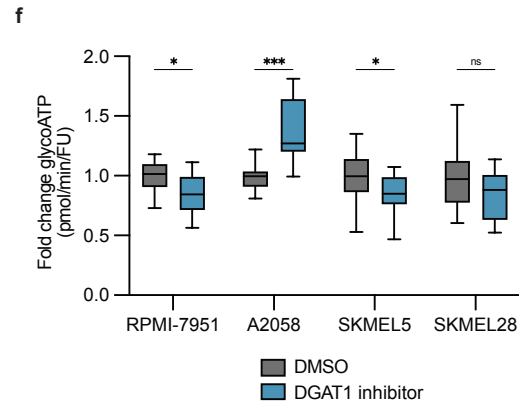

Supplementary Fig. 10: DGAT1 inhibition disrupts metabolic homeostasis. a-d, Seahorse ATP Rate Energetic Maps for (a) RPMI-7951, (b) A2058, (c) SKMEL5, and (d) SKMEL28 cells (mean  $\pm$  SEM, n = 3 biologically independent experiments). e-f, Fold change of (e) mitoATP and (f) glycoATP treated with DMSO or 40  $\mu$ M DGAT1 inhibitor (Tukey's boxplot center = median, box bounds = 25th and 75th percentile, whiskers = min and max, n = 3 biologically independent experiments). Statistics via two-sided Mann-Whitney test with Holm-Sidak correction. \*  $p < 0.05$ , \*\*  $p < 0.01$ , \*\*\*  $p < 0.001$ .
