# Supplementary material for: Lipid droplets are a metabolic vulnerability in melanoma
Source: PubMed Central journal article supplement (PMC10238408; doi:10.1038/s41467-023-38831-9), 2023-06-02
Supplement: 41467_2023_38831_MOESM3_ESM.pdf [file 41467_2023_38831_MOESM3_ESM.pdf]

**File name: Supplementary Data 1**

**Description:** Single-cell RNA sequencing of zebrafish melanomas generated by transgene electroporation. Tabs represent the 5 main melanoma cell clusters that correspond to similar clusters seen in human melanoma.

**File name: Supplementary Data 2**

**Description:** Bulk RNA sequencing of zebrafish melanomas with or without DGAT1 CRISPR. Melanoma cells were sorted using the tdTomato transgene.
